# Supplementary material
Source: HighWire-hosted journal article supplement (https://svn.smart01.highwire.org/content/9/3/202)
Supplement: inline-supplementary-material-1 [file inline-supplementary-material-1.pdf]

**Supplementary Online Content**

**Table S1.** Single Nucleotide Polymorphism Associated with Serum total Homocysteine

**Figure S1.** Leave-one-out analysis on the MR estimates by removing each SNP individually

**Table S2.** Baseline Characteristics Before and After IPTW (Inverse Probability of Treatment Weighting)

**Table S3.** Association between tHcy and Intracranial Aneurysm Based on IPTW Analysis

**Table S4.** Additive Interaction Analysis on tHcy and Hypertension

**Table S1.** Single Nucleotide Porlyphorysm Associated with Serum total Homocysteine

| SNP       | Chr | Position  | Nearest gene | EA | EAF  | NEA | Beta   | SE    | P        |
|-----------|-----|-----------|--------------|----|------|-----|--------|-------|----------|
| rs2275565 | 1   | 237048676 | MTR          | G  | 0.79 | T   | 0.0542 | 0.009 | 1.96e-10 |
| rs9369898 | 6   | 49382193  | MUT          | A  | 0.62 | G   | 0.0449 | 0.007 | 2.17e-10 |
| rs7130284 | 11  | 89148372  | NOX4         | C  | 0.93 | T   | 0.1242 | 0.013 | 1.88e-20 |
| rs234709  | 21  | 44486964  | CBS          | C  | 0.55 | T   | 0.0718 | 0.007 | 3.9e-24  |
| rs42648   | 7   | 89977760  | GTPB10       | G  | 0.6  | A   | 0.0395 | 0.007 | 1.97e-08 |
| rs1801222 | 10  | 17156151  | CUBN         | A  | 0.34 | G   | 0.0453 | 0.007 | 8.43e-10 |
| rs2251468 | 12  | 121405126 | HNF1A        | C  | 0.35 | A   | 0.0512 | 0.007 | 1.28e-12 |
| rs957140  | 11  | 89201627  | NOX4         | G  | 0.55 | A   | 0.045  | 0.008 | 2.43e-08 |
| rs2851391 | 21  | 43067294  | CBS          | T  | 0.47 | C   | 0.056  | 0.008 | 1.7e-12  |

Abbreviation: SNP, single nucleotide porlyphorysm ; Chr, chromosome; EA, effect allele; EAF, effect allele frequency; NEA non-effective allele; Beta, coefficient presented as the number of SD difference in homocysteine concentrations per allele; SE, standard error.

**Figure S1.** Leave-one-out analysis on the MR estimates by removing each SNP individually

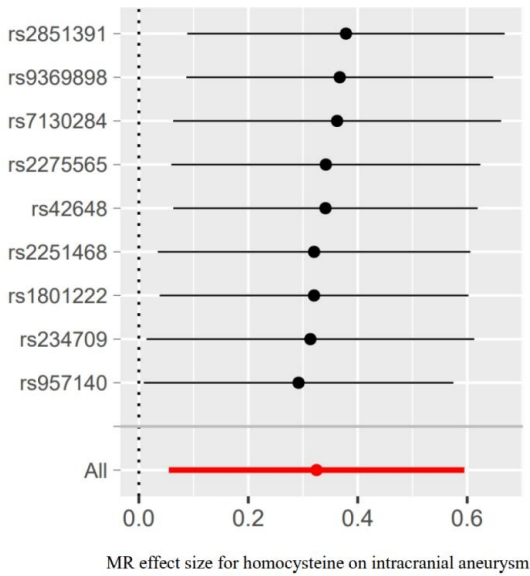

The leave-one-out analysis confirmed that Mendelian Randomization result for causal association of tHcy with intracranial aneurysm was robust and reliable as it was not driven by any single SNP.

| Table S2 Baseline Characteristics Before and After IPTW (Inverse Probability of Treatment Weighting) |             |             |        |                |                |       |
|------------------------------------------------------------------------------------------------------|-------------|-------------|--------|----------------|----------------|-------|
|                                                                                                      | Before IPTW |             |        | IPTW           |                |       |
|                                                                                                      | non-IAs     | IAs         | p      | non-IAs        | IAs            | p     |
|                                                                                                      | n = 9831    | n = 5496    |        | n = 15464.1    | n = 15084.1    |       |
| Sex, No.(%)                                                                                          |             |             | <0.001 |                |                | 0.447 |
| Male                                                                                                 | 5693 (57.9) | 2254 (41.0) |        | 8021.1 (51.9)  | 7935.8 (52.6)  |       |
| Female                                                                                               | 4138 (42.1) | 3242 (59.0) |        | 7440.0 (48.1)  | 7148.3 (47.4)  |       |
| Age, mean, (SD), y                                                                                   | 63.9 (13.5) | 57.8 (12.0) | <0.001 | 61.3 (13.9)    | 61.2 (13.2)    | 0.717 |
| Age class, No.(%)                                                                                    |             |             | <0.001 |                |                | 0.654 |
| 18-39 y                                                                                              | 477 (4.9)   | 394 (7.2)   |        | 934.7 (6.0)    | 964.7 (6.4)    |       |
| 40-59 y                                                                                              | 2981 (30.3) | 2656 (48.3) |        | 5779.9 (37.4)  | 5679.4 (37.7)  |       |
| ≥60 y                                                                                                | 6373 (64.8) | 2446 (44.5) |        | 8749.5 (56.6)  | 8439.9 (56.0)  |       |
| BP class, mmHg,                                                                                      |             |             | <0.001 |                |                | 0.746 |
| SBP / DBP, No.(%)                                                                                    |             |             |        |                |                |       |
| < 140 / < 90                                                                                         | 3449 (35.1) | 2434 (44.3) |        | 5947.3 (38.5)  | 5767.8 (38.2)  |       |
| 140~159 / 90~99                                                                                      | 3404 (34.6) | 1111 (20.2) |        | 4484.0 (29.0)  | 4268.2 (28.3)  |       |
| 160~179 / 100~109                                                                                    | 2065 (21.0) | 888 (16.2)  |        | 2953.0 (19.1)  | 2973.3 (19.7)  |       |
| ≥180 / ≥110                                                                                          | 913 (9.3)   | 1063 (19.3) |        | 2079.8 (13.4)  | 2074.8 (13.8)  |       |
| Hyperlipidemia, No.(%)                                                                               |             |             | <0.001 |                |                | 0.688 |
| No                                                                                                   | 4726 (48.1) | 3060 (55.7) |        | 7900.4 (51.2)  | 7764.3 (51.5)  |       |
| Yes                                                                                                  | 5105 (51.9) | 2436 (44.3) |        | 7563.7 (48.9)  | 7319.8 (48.5)  |       |
| Diabetes, type 1 and 2                                                                               |             |             | <0.001 |                |                | 0.803 |
| No                                                                                                   | 7098 (72.2) | 4319 (78.6) |        | 11559.5 (74.8) | 11241.9 (74.5) |       |
| Yes                                                                                                  | 2733 (27.8) | 1177 (21.4) |        | 3904.6 (25.2)  | 3842.2 (25.5)  |       |
| Smoke*, No.(%)                                                                                       |             |             | <0.001 |                |                | 0.823 |
| No                                                                                                   | 7684 (78.2) | 4778 (86.9) |        | 12601.2 (81.5) | 12318.3 (81.7) |       |
| Yes                                                                                                  | 2147 (21.8) | 718 (13.1)  |        | 2862.9 (18.5)  | 2765.8 (18.3)  |       |
| Alcohol use†, No.(%)                                                                                 |             |             | <0.001 |                |                | 0.507 |
| No                                                                                                   | 7892 (90.0) | 4775 (92.6) |        | 12711.3 (81.0) | 13719.7 (91.2) |       |
| Yes                                                                                                  | 875 (9.98)  | 383 (7.43)  |        | 2752.8 (9.0)   | 1364.4 (8.8)   |       |

\*,†: missing data was imputed for 830 (5.4%) and 1,402 (9.1%) patients about smoking and alcohol using by Multiple Imputaion utilizing Mice package (3.14) for R (4.2.2)  
Abbreviation: BP, blood pressure; SBP, systolic blood pressure; DBP, diastolic blood pressure.

| Table S3 Association between tHcy and Intracranial Aneurysm Based on IPTW Analysis |                |                |                  |                    |                  |                    |
|------------------------------------------------------------------------------------|----------------|----------------|------------------|--------------------|------------------|--------------------|
| IPTW                                                                               |                |                |                  |                    |                  |                    |
|                                                                                    | non-IAs        | IAs            | Crude OR         |                    | Adjusted OR*     |                    |
|                                                                                    | n=15464.1      | n=15084.1      | 95% CI           | p                  | 95% CI           | p                  |
| tHcy <sup>†</sup> (SD), umol/L                                                     | 12.5 (6.2)     | 14.9 (10.7)    | 1.51 (1.46;1.56) | < .001             | 1.56 (1.50;1.61) | < .001             |
| tHcy <sup>‡</sup>                                                                  |                |                | 1.28 (1.26;1.31) | < .001             | 1.31 (1.28;1.34) | < .001             |
| Group tHcy, No.(%)                                                                 |                |                |                  | <.001 <sup>§</sup> |                  | <.001 <sup>§</sup> |
| Low                                                                                | 12321.0 (79.7) | 10078.4 (66.8) | Reference.       |                    | Reference.       |                    |
| Moderate                                                                           | 2868.3 (18.5)  | 4423.3 (29.3)  | 1.89 (1.79;1.99) | < .001             | 1.97 (1.69;2.30) | < .001             |
| High                                                                               | 274.9 (1.8)    | 582.4 (3.9)    | 2.59 (2.23;3.00) | < .001             | 0.97 (0.87;1.08) | .558               |
| Moderate + High                                                                    | 796 (16.1)     | 1487 (30.0)    | 1.95 (1.85;2.05) | < .001             | 1.71 (1.61;1.81) | < .001             |

P-value for OR (odd ratios) was based on Wald tests;

\*: Odds ratios was adjusted by age, sex, blood pressure level and smoke;

†: OR was estimated by per 1 standard difference increase of tHcy (8.2 μmol/L);

‡: OR was estimated by per 5μmol/L increase of tHcy;

§: P value for trend.

| Table S4 Additive Interaction Analysis on tHcy and Hypertension |            |              |        |            |              |        |
|-----------------------------------------------------------------|------------|--------------|--------|------------|--------------|--------|
|                                                                 | PSM Model  |              |        | IPTW Model |              |        |
|                                                                 | OR*        | 95% CI†      | p      | OR*        | 95% CI†      | p      |
| tHcy<15umol/L + no HBP                                          | Reference. |              |        | Reference. |              |        |
| tHcy≥15umol/L + no HBP                                          | 1.18       | (1.08; 1.30) | <0.001 | 1.16       | (1.11; 1.22) | <0.001 |
| tHcy<15umol/L + HBP                                             | 0.68       | (0.61; 0.75) | <0.001 | 0.71       | (0.67; 0.75) | <0.001 |
| tHcy≥15umol/L + HBP                                             | 2.51       | (2.25; 2.81) | <0.001 | 2.14       | (2.01; 2.27) | <0.001 |
| Estimation of Interaction                                       |            |              |        |            |              |        |
| Statistic                                                       | Value      | 95% CI       |        | Value      | 95% CI       |        |
| RERI                                                            | 1.65       | (1.29;2.01)  |        | 1.27       | (1.27;1.44)  |        |
| AP                                                              | 0.66       | (0.58;0.74)  |        | 0.60       | (0.54;0.65)  |        |

\*: OR, Odds Ratio

†: CI, Confidence Interval

‡: RERI, Relative excess risk due to interaction (part of the total effect that is due to interaction), defined as  $OR_{A+B} - OR_{A+B-} - OR_{A-B+} - 1$ ; RERI > 1 means positive interaction or more than additivity.<sup>[1]</sup> RERI < 1 means negative interaction or less than additivity.

§: AP, Proportion attributable to interaction (proportion of the combined effect that is due to interaction),  $AP = RERI / OR_{A+B+}$ <sup>[1]</sup>. AP > 0 means positive interaction or more than additivity. AP < 0 means negative interaction or less than additivity.

References.

1. Knol MJ, VanderWeele TJ, Groenwold RH, Klungel OH, Rovers MM, Grobbee DE. Estimating measures of interaction on an additive scale for preventive exposures. *EUR J EPIDEMIOL.* 2011;26(6):433-8. doi:10.1007/s10654-011-9554-9
